1

## Robust estimation of sulcal morphology

2

Christopher R. Madan

3

School of Psychology

4

University of Nottingham

5

Nottingham, United Kingdom

6

7

Corresponding author:

8

Christopher R. Madan

9

School of Psychology, University of Nottingham

10

Nottingham, NG7 2RD, United Kingdom

11

[christopher.madan@nottingham.ac.uk](mailto:christopher.madan@nottingham.ac.uk)

12 Abstract

13 While it is well established that cortical morphology differs in relation to a variety of  
14 inter-individual factors, it is often characterized using estimates of volume, thickness,  
15 surface area, or gyrification. Here we developed a computational approach for  
16 estimating sulcal width and depth that relies on cortical surface reconstructions output  
17 by FreeSurfer. While other approaches for estimating sulcal morphology exist, studies  
18 often require the use of multiple brain morphology programs that have been shown to  
19 differ in their approaches to localize sulcal landmarks, yielding morphological  
20 estimates based on inconsistent boundaries. To demonstrate the approach, sulcal  
21 morphology was estimated in three large sample of adults across the lifespan, in  
22 relation to aging. A fourth sample is additionally used to estimate test-retest reliability  
23 of the approach. This toolbox is now made freely available as supplemental to this  
24 paper: <https://cmadan.github.io/calcSulc/>.

25

26 **Keywords:** sulcal width; sulcal depth; age; cortical structure; atrophy; gyrification;  
27 cerebral sulci

## 28 Robust estimation of sulcal morphology

### 29 **1 Introduction**

30 Cortical structure differs between individuals. It is well known that cortical thickness  
31 generally decreases with age (Fjell et al., 2009; Hogstrom et al., 2013; Hutton et al., 2009;  
32 Lemaitre et al., 2012; Madan & Kensinger, 2016, 2018; Madan, 2018; McKay et al., 2014;  
33 Salat et al., 2004; Sowell et al., 2003, 2007); however, a more visually prominent  
34 difference is the widening of sulci, sometimes described as “sulcal prominence”  
35 (Coffey et al., 1992; Drayer, 1988; Jacoby et al., 1980; Laffey et al., 1984; Tomlinson et al.,  
36 1968; Yue et al., 1997). In the literature, this measure has been referred to using a  
37 variety of names, including sulcal width, span, dilation, and enlargement, as well as  
38 fold opening. With respect to aging and brain morphology, sulcal width has been  
39 assessed qualitatively by clinicians as an index of cortical atrophy (Coffey et al., 1992;  
40 Drayer, 1988; Laffey et al., 1984; Pasquier et al., 1996; Scheltens et al., 1997; Tomlinson  
41 et al., 1968). An illustration of age-related differences in sulcal morphology is shown in  
42 Figure 1.

43 Using quantitative approaches, sulcal width has been shown to increase with age  
44 (Kochunov et al., 2005, 2008; Liu et al., 2010, 2013) likely relating to subsequent  
45 findings of age-related decreases in cortical gyrification (Cao et al., 2017; Hogstrom et  
46 al., 2013; Madan & Kensinger, 2016, 2018; Madan, 2018). Sulcal widening has also been  
47 shown to be associated with decreases in cognitive abilities (Liu et al., 2011) and  
48 physical activity (Lamont et al., 2014). With respect to clinical conditions, increased  
49 sulcal width has been found in dementia patients relative to healthy controls  
50 (Andersen et al., 2015; Hamelin et al., 2015; Huckman et al., 1975; Liu et al., 2012; Ming  
51 et al., 2015; Plochanski & Østergaard, 2016; Reiner et al., 2012), as well as with  
52 schizophrenia patients (Largen et al., 1984; Palaniyappan et al., 2015; Rieder et al., 1979)  
53 and mood disorders (Elkis et al., 1995).

54 One of the most common programs for conducting cortical surface analyses is  
55 FreeSurfer (Fischl, 2012). Unfortunately, though FreeSurfer reconstructs cortical

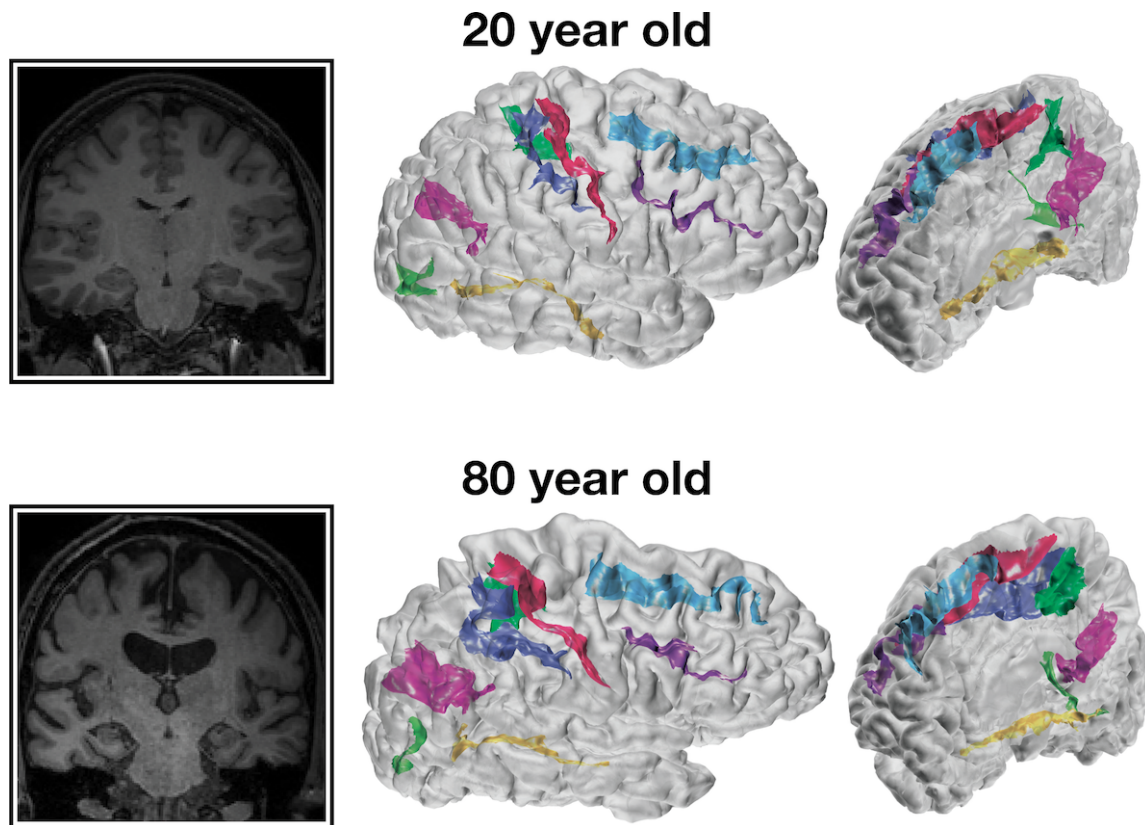

Figure 1. Representative coronal slices and cortical surfaces with sulcal identification for 20- and 80-year-old individuals.

56 surfaces, it does not estimate sulcal width or depth, leading researchers to use  
57 FreeSurfer along with another surface analysis program, BrainVISA (Kochunov et al.,  
58 2012; Mangin, Rivière, et al., 2004; Mangin, Riviere, et al., 2004; Rivière et al., 2002), to  
59 characterize cortical thickness along with sulcal morphology (e.g. Cai et al., 2017;  
60 Lamont et al., 2014; Liu et al., 2011, 2013; Pizzagalli et al., 2017). While this combination  
61 allows for the estimation of sulcal morphology in addition to standard measures such  
62 as cortical thickness, FreeSurfer and BrainVISA rely on different anatomical landmarks  
63 (Mikhael et al., 2018) which can yield differences in their resulting cortical surface  
64 reconstructions (Lee et al., 2006). Admittedly, determining the boundaries for an  
65 individual sulcus and incorporating individual cortical variability is difficult (Campero  
66 et al., 2014; John et al., 2006; Mikhael et al., 2018; Ono et al., 1990; Rhoton, 2007; ten  
67 Donkelaar et al., 2018; Welker, 1990). While an ennumerate amount of other methods  
68 have already been proposed to identify and characterize sulcal morphology (e.g.,

69 Andreasen et al., 1994; Auzias et al., 2015; Beeston & Taylor, 2000; Behnke et al., 2003;  
70 Eskildsen et al., 2005; Im et al., 2010; Jones et al., 2000; Le Goualher et al., 1996, 1998; Le  
71 Troter et al., 2012; Li & Shen, 2011; Li et al., 2010; Lohmann & von Cramon, 2000;  
72 Lohmann et al., 2008; Nowinski et al., 1996; Oguz et al., 2008; Perrot et al., 2011;  
73 Royackkers et al., 1999; Thompson et al., 1996; Vaillant & Davatzikos, 1997; Yang &  
74 Kruggel, 2008; Yun et al., 2013), ultimately these all are again using different landmarks  
75 than FreeSurfer uses for cortical parcellations (i.e., volume, thickness, surface area,  
76 gyrification). Note that, though FreeSurfer itself does compute sulcal maps, these are  
77 computed as normalized depths, not in real-world units (e.g. Kippenhan et al., 2005),  
78 furthermore, these are also independent of sulcal width information.

79 Here we describe a procedure for estimating sulcal morphology and report  
80 age-related differences in sulcal width and depth using three large samples of adults  
81 across the lifespan: two of these datasets are from Western samples, Dallas Lifespan  
82 Brain Study (DLBS) and Open Access Series of Imaging Studies (OASIS), as well as one  
83 East Asian sample, Southwest University Adult Lifespan (SALD), as potential  
84 differences between populations have been relatively understudied (Leong et al., 2017;  
85 Madan, 2017). To further validate the method, test-retest reliability was also assessed  
86 using a sample of young adults who were scanned ten times within the span of a  
87 month (Chen et al., 2015; Madan & Kensinger, 2017b). All four of these datasets are  
88 open-access and have sufficient sample sizes to be suitable for brain morphology  
89 research (Madan, 2017). This procedure has been implemented as a MATLAB toolbox,  
90 `calcSulc`, that calculates sulcal morphology—both width and depth—using files  
91 generated as part of the standard FreeSurfer cortical reconstruction and parcellation  
92 pipeline. This toolbox is now made freely available as supplemental to this paper:  
93 <https://cmadan.github.io/calcSulc/>.

## 94 2 Materials and Methods

### 95 2.1 Datasets

96 **OASIS.** This dataset consisted of 314 healthy adults (196 females), aged 18–94 (see  
97 Figure 2), from the Open Access Series of Imaging Studies (OASIS) cross-sectional  
98 dataset (<http://www.oasis-brains.org>) (Marcus et al., 2007). Participants were  
99 recruited from a database of individuals who had (a) previously participated in MRI  
100 studies at Washington University, (b) were part of the Washington University  
101 Community, or (c) were from the longitudinal pool of the Washington University  
102 Alzheimer Disease Research Center. Participants were screened for neurological and  
103 psychiatric issues; the Mini-Mental State Examination (MMSE) and Clinical Dementia  
104 Rating (CDR) were administered to participants aged 60 and older. To only include  
105 healthy adults, participants with a CDR above zero were excluded; all remaining  
106 participants scored 25 or above on the MMSE. Multiple T1 volumes were acquired  
107 using a Siemens Vision 1.5 T with a MPRAGE sequence; only the first volume was used  
108 here. Scan parameters were: TR=9.7 ms; TE=4.0 ms; flip angle=10°;  
109 voxel size=1.25×1×1 mm. Age-related comparisons for volumetric and fractal  
110 dimensionality measures from the OASIS dataset were previously reported in Madan

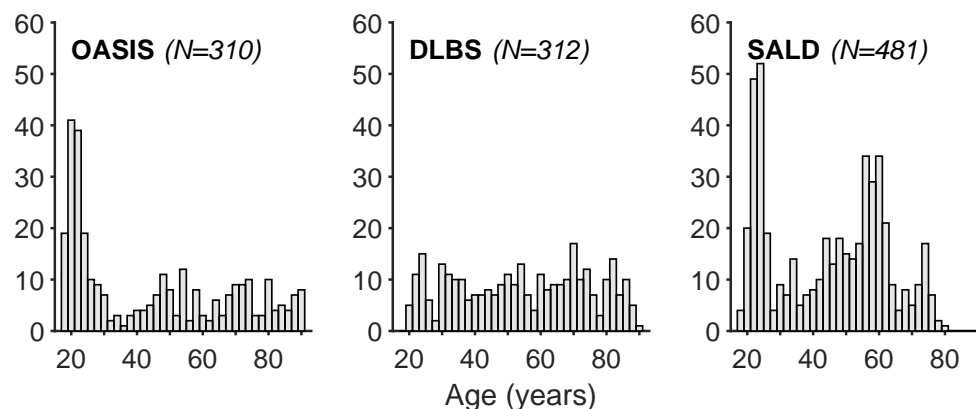

Figure 2. Histogram of age distribution for the three aging datasets: OASIS, DLBS, and SALD, only for participants included in the sulcal morphology analyses. Each bar corresponds to a two-year age-range bin.

111 and Kensinger (2017a), Madan and Kensinger (2018), and Madan (2019) <sup>1</sup>.

112 **DLBS.** This dataset consisted of 315 healthy adults (198 females), aged 20–89 (see  
113 Figure 2), from wave 1 of the Dallas Lifespan Brain Study (DLBS), made available  
114 through the International Neuroimaging Data-sharing Initiative (INDI) (Mennes et al.,  
115 2013) and hosted on the Neuroimaging Informatics Tools and Resources Clearinghouse  
116 (NITRC) (Kennedy et al., 2016)

117 ([http://fcon\\_1000.projects.nitrc.org/indi/retro/dlbs.html](http://fcon_1000.projects.nitrc.org/indi/retro/dlbs.html)).

118 Participants were screened for neurological and psychiatric issues. No participants in  
119 this dataset were excluded *a priori*. All participants scored 26 or above on the MMSE.  
120 T1 volumes were acquired using a Philips Achieva 3 T with a MPRAGE sequence. Scan  
121 parameters were: TR=8.1 ms; TE=3.7 ms; flip angle=12°; voxel size=1×1×1 mm. See  
122 Kennedy et al. (2015) and Chan et al. (2014) for further details about the dataset.

123 Age-related comparisons for volumetric and fractal dimensionality measures from the  
124 DLBS dataset were previously reported in Madan and Kensinger (2017a), Madan and  
125 Kensinger (2018), and Madan (2019) <sup>1</sup>.

126 **SALD.** This dataset consisted of 483 healthy adults (303 females), aged 19–80 (see  
127 Figure 2), from the Southwest University Adult Lifespan Dataset (SALD) (Wei et al.,  
128 2018), also made available through INDI and hosted on NITRC

129 ([http://fcon\\_1000.projects.nitrc.org/indi/retro/sald.html](http://fcon_1000.projects.nitrc.org/indi/retro/sald.html)). No  
130 participants in this dataset were excluded *a priori*. T1 volumes were acquired using a  
131 Siemens Trio 3 T with a MPRAGE sequence. Scan parameters were: TR=1.9 s;  
132 TE=2.52 ms; flip angle=9°; voxel size=1×1×1 mm.

133 **CCBD.** This dataset consisted of 30 healthy adults (15 females), aged 20–30, from the  
134 Center for Cognition and Brain Disorders (CCBD) at Hangzhou Normal University  
135 (Chen et al., 2015). Each participant was scanned for 10 sessions, occurring 2–3 days

---

<sup>1</sup>Note that analyses reported in these previous papers were based on preprocessing in FreeSurfer 5.3.0, rather than FreeSurfer 6.0.



136 apart over a one-month period. No participants in this dataset were excluded *a priori*.  
137 T1 volumes were acquired using a SCANNER with a FSPGR sequence. Scan  
138 parameters were: TR=8.06 ms; TE=3.1 ms; flip angle=8°; voxel size: 1×1×1 mm. This  
139 dataset is included as part of the Consortium for Reliability and Reproducibility  
140 (CoRR) (Zuo et al., 2014) as HNU1. Test-retest comparisons for volumetric and fractal  
141 dimensionality measures from the CCBD dataset were previously reported in Madan  
142 and Kensinger (2017b)<sup>1</sup>.

## 143 **2.2 Procedure**

144 Data were analyzed using FreeSurfer v6.0  
145 (<https://surfer.nmr.mgh.harvard.edu>) on a machine running Red Hat  
146 Enterprise Linux (RHEL) v7.4. FreeSurfer was used to automatically volumetrically  
147 segment and parcellate cortical and subcortical structures from the T1-weighted  
148 images (Fischl, 2012; Fischl & Dale, 2000) FreeSurfer's standard pipeline was used (i.e.,  
149 `recon-all`). No manual edits were made to the surface meshes, but surfaces were  
150 visually inspected. Cortical thickness is calculated as the distance between the white  
151 matter surface (white-gray interface) and pial surface (gray-CSF interface) .  
152 Gyrification was also calculated using FreeSurfer, as described in Schaer et al. (2012).  
153 Cortical regions were parcellated based on the Destrieux et al. (2010) atlas, also part of  
154 the standard FreeSurfer analysis pipeline.

## 155 **3 Calculation**

156 Here we outline a novel, simple yet robust, automated approach for estimating sulcal  
157 width and depth, based on intermediate files generated as part of the standard  
158 FreeSurfer analysis pipeline. This procedure and functionality has been implemented  
159 in an accompanying MATLAB toolbox, `calcSulc`. The toolbox is supplemental  
160 material to this paper and is made freely available:  
161 <https://cmadan.github.io/calcSulc/>.



162 For each individual sulcus (for each hemisphere and participant), the following  
163 approach was used to characterize the sulcal morphology. The procedure has been  
164 validated and is supported for the following sulci: central, post-central, superior  
165 frontal, inferior frontal, parieto-occipital, occipito-temporal, middle occipital and  
166 lunate, and marginal part of the cingulate (`S_central`, `S_postcentral`,  
167 `S_front_sup`, `S_front_inf`, `S_parieto_occipital`,  
168 `S_oc-temp_med&Lingual`, `S_oc_middle&Lunatus`, `S_cingul-Marginalis`).  
169 All of the sulci are labeled in Figure 3.

170 First the pial surface and Destrieux et al. (2010) parcellation labels were read into  
171 MATLAB by using the FreeSurfer-MATLAB toolbox provided alongside FreeSurfer  
172 (`calcSulc_load`), this consists of the `?h.pial` (FreeSurfer cortical surface mesh)  
173 `?h.aparc.a2009s.annot` (FreeSurfer parcellation annotation) files. Using this, the  
174 faces associated with the individual sulcus were isolated as a 3D mesh  
175 (`calcSulc_isolate`).

176 The width of each sulcus (`calcSulc_width`) was calculated by determining  
177 which vertices lay on the boundary of the sulcus and the adjacent gyrus. An iterative  
178 procedure was then used to determine the 'chain' of edges that would form a  
179 contiguous edge-loop that encircle the sulcal region (`calcSulc_getEdgeLoop`). This  
180 provided an exhaustive list of all vertices that were mid-way between the peak of the

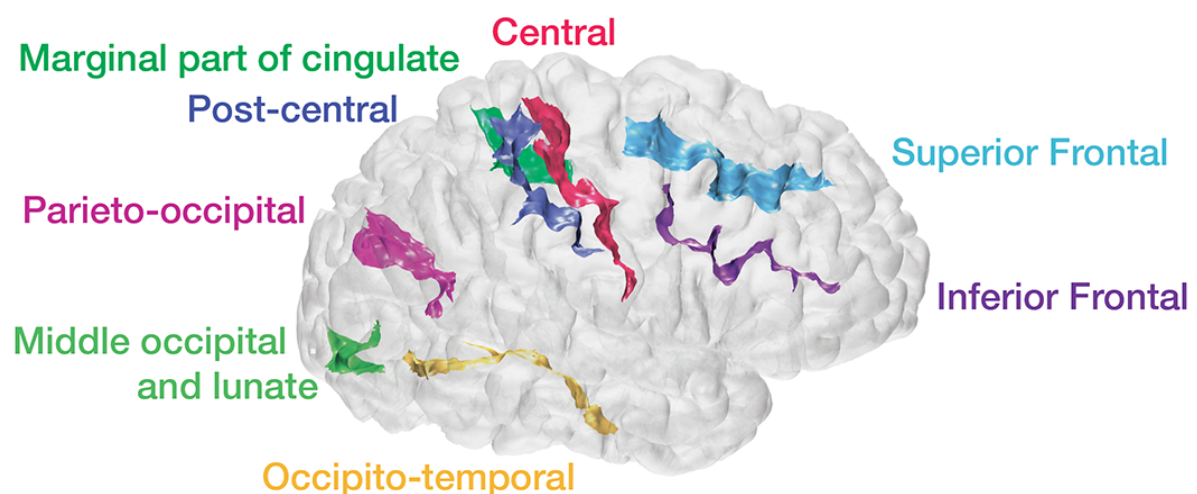

Figure 3. Example cortical surface with estimated sulci identified and labelled.

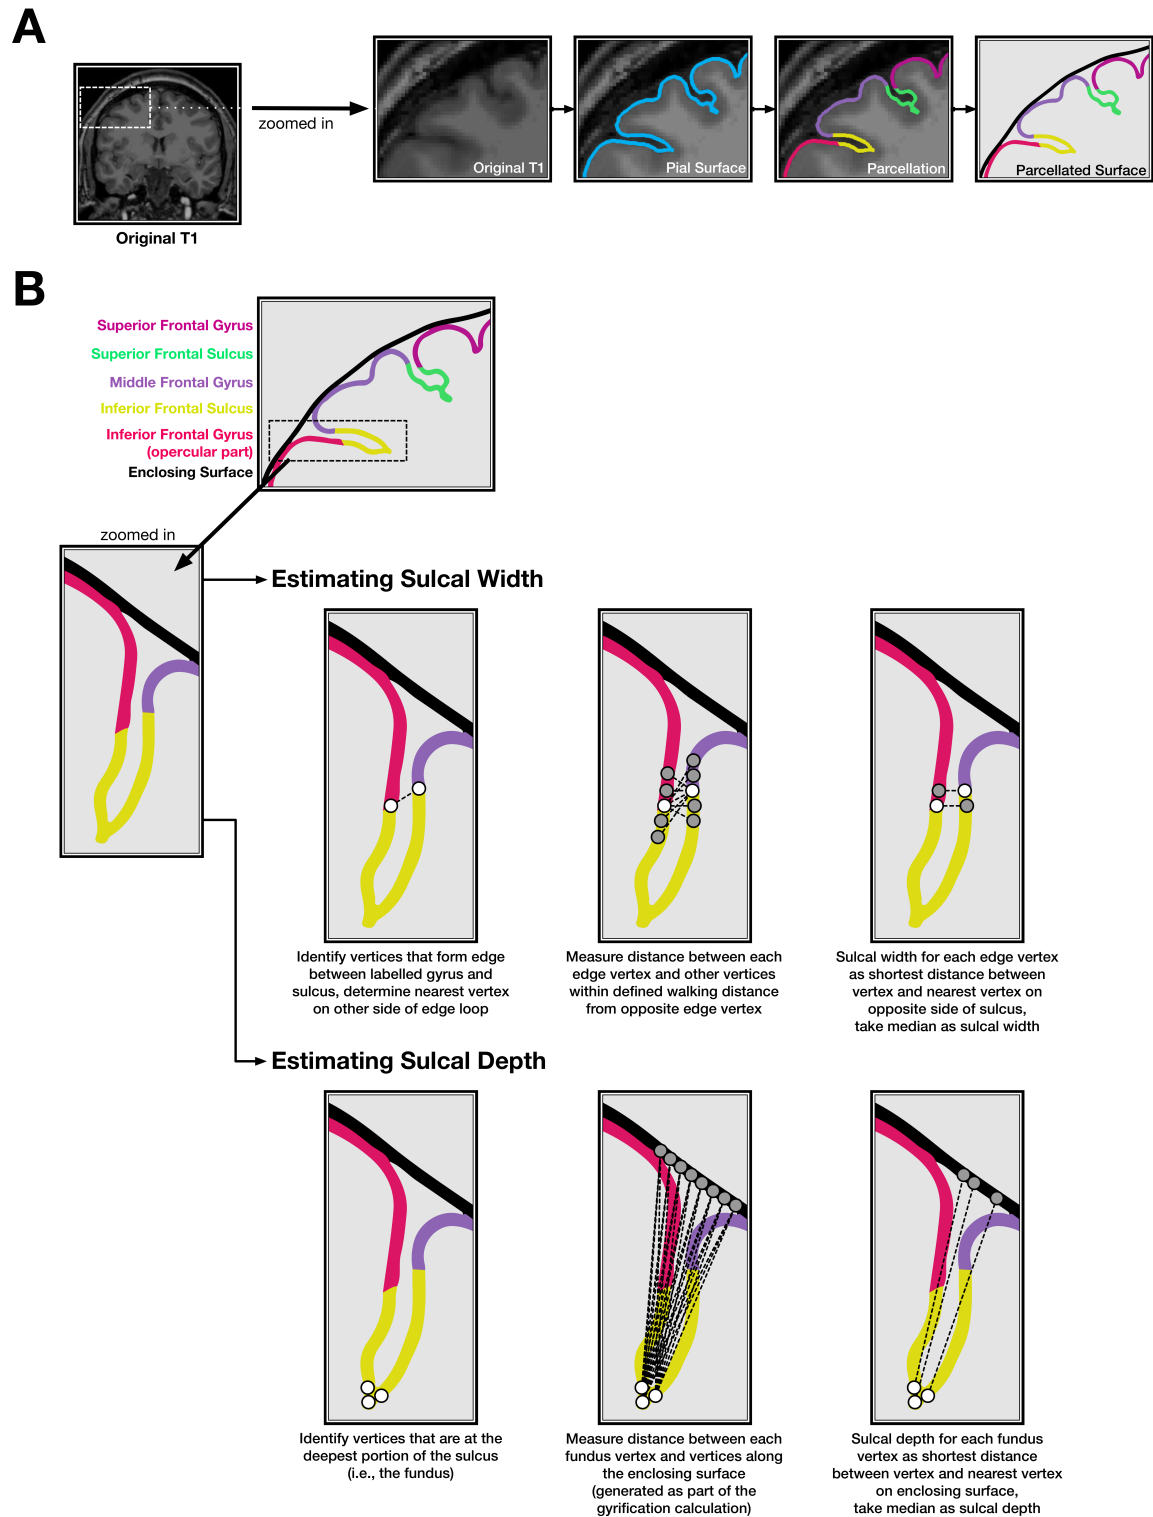

Figure 4. Illustration of the sulcal morphology method. (A) Cortical surface estimation and sulcal identification, as output from FreeSurfer. (B) Sulcal width and depth estimation procedure. Note that the surface mesh and estimation algorithm use many more vertices than shown here.

181 respective adjacent gyri and depth of the sulcus itself. For each vertex in this edge-loop,  
182 the nearest point in 3D space that was *not* neighbouring in the loop was determined,  
183 with the goal of finding the nearest vertex in the edge that was on the opposite side of  
184 the sulcus—i.e., a line between these two vertices would ‘bridge’ across the sulcus. Since  
185 these nearest vertices in the edge loop are not necessarily the nearest vertex along the  
186 opposite sulcus wall, an exhaustive search (walk) was performed, moving up to a 4  
187 edges from the initially determined nearest vertex (configurable as  
188 `options.setWidthWalk`). The sulcal width was then taken as the median of these  
189 distances that bridged across the sulcus.

190 The depth of each sulcus (`calcSulc_depth`) additionally used FreeSurfer’s  
191 sulcal maps (`?h.sulc`) to determine the relative inflections in the surface mesh, which  
192 would be in alignment with the gyral crown. The deepest points of the sulcus, i.e., the  
193 sulcal fundus, were taken as the 100 vertices within the sulcus with the lowest values  
194 in the sulcal map. For these 100 vertices, the shortest (i.e., Euclidean) distance to the  
195 smoothed enclosing surface was calculated (generated by FreeSurfer’s built-in  
196 gyrification analysis [`?h.pial-outer-smoothed`], Schaer et al., 2012), and the  
197 median of these was then taken as the sulcal depth. While the use of a Euclidean  
198 distance here underestimates the true sulcal depth, it is nonetheless robust (as  
199 demonstrated in the present work) and does not markedly differ from other  
200 algorithmic approaches for estimating sulcal depth for much of the cortex (see Yun et  
201 al., 2013, for a comparison).

202 Sulcal morphology, width and depth, was estimated for eight major sulci in each  
203 hemisphere: central, post-central, superior frontal, inferior frontal, parieto-occipital,  
204 occipito-temporal, middle occipital and lunate, and marginal part of the cingulate  
205 (`S_central`, `S_postcentral`, `S_front_sup`, `S_front_inf`,  
206 `S_parieto_occipital`, `S_oc-temp_med&Lingual`, `S_oc_middle&Lunatus`,  
207 `S_cingul-Marginalis`). Preliminary analyses additionally included superior and  
208 inferior temporal sulci and intraparietal sulcus but these were removed from further  
209 analysis when the sulci width estimation was found to fail to determine a closed

210 boundary edge-loop at an unacceptable rate ( $> 10\%$ ) for at least one hemisphere. This  
211 edge boundary determination failed when parcellated regions were labeled by  
212 FreeSurfer to comprise at least two discontinuous regions, such that they could not be  
213 identified using a single edge loop. Nonetheless, sulcal measures failed to be estimated  
214 for some participants, resulting in final samples of 310 adults from the OASIS dataset,  
215 312 adults from the DLBS dataset, 481 adults from the SALD dataset, and 30 adults  
216 from the CCBD dataset (see Figure 2).

### 217 **3.1 Test-retest reliability**

218 Test-retest reliability was assessed as intraclass correlation coefficient (*ICC*), which can  
219 be used to quantify the relationship between multiple measurements (Asendorpf &  
220 Wallbott, 1979; Bartko, 1966; Chen et al., 2018; Hallgren, 2012; Koo & Li, 2016; Madan &  
221 Kensinger, 2017b; Rajaratnam, 1960; Shrout & Fleiss, 1979). McGraw and Wong (1996)  
222 provide a comprehensive review of the various *ICC* formulas and their applicability to  
223 different research questions. *ICC* was calculated as the one-way random effects model  
224 for the consistency of single measurements, i.e., *ICC*(1, 1). As a general guideline,  
225 *ICC* values between .75 and 1.00 are considered 'excellent,' .60–.74 is 'good,' .40–.59 is  
226 'fair,' and below .40 is 'poor' (Cicchetti, 1994).

## 227 **4 Results & Discussion**

### 228 **4.1 Age-related differences in sulcal morphology**

229 Scatter plots showing the relationships between each individual sulcal width and  
230 depth and age, for the OASIS dataset, are shown in Figure 5; the corresponding  
231 correlations for all datasets are shown in Tables 1 and 2. The width and depth of the  
232 central and post-central sulci appear to be particularly correlated with age, with wider  
233 and shallower sulci in older adults. Age-related differences in sulcal width and depth  
234 and generally present in other sulci as well, but are generally weaker.

235 Age-related relationships for each sulcus were relatively consistent between the

236 two Western lifespan datasets (OASIS and DLBS), but age-related differences in sulcal  
237 width (but not depth) were markedly weaker in the East Asian lifespan dataset (SALD).  
238 This finding will need to be studied further, but may be related to gross differences in  
239 anatomical structure (Kochunov et al., 2003; Longstreth et al., 2000; Tang et al.,  
240 2010)—and motivates the need to aging in samples that vary in ethnicity/race and are  
241 otherwise not of a so-called WEIRD (Western, Educated, Industrialized, Rich, and  
242 Democratic) demographic (Madan, 2017). Additionally, there did not appear to be a  
243 significant influence of field strength (i.e., 1.5 T for the OASIS dataset vs. 3 T for the  
244 DLBS dataset) on estimates of sulcal morphology. Importantly, test-retest reliability,  
245  $ICC(1, 1)$ , was particularly good for the sulcal depth across individual sulci.

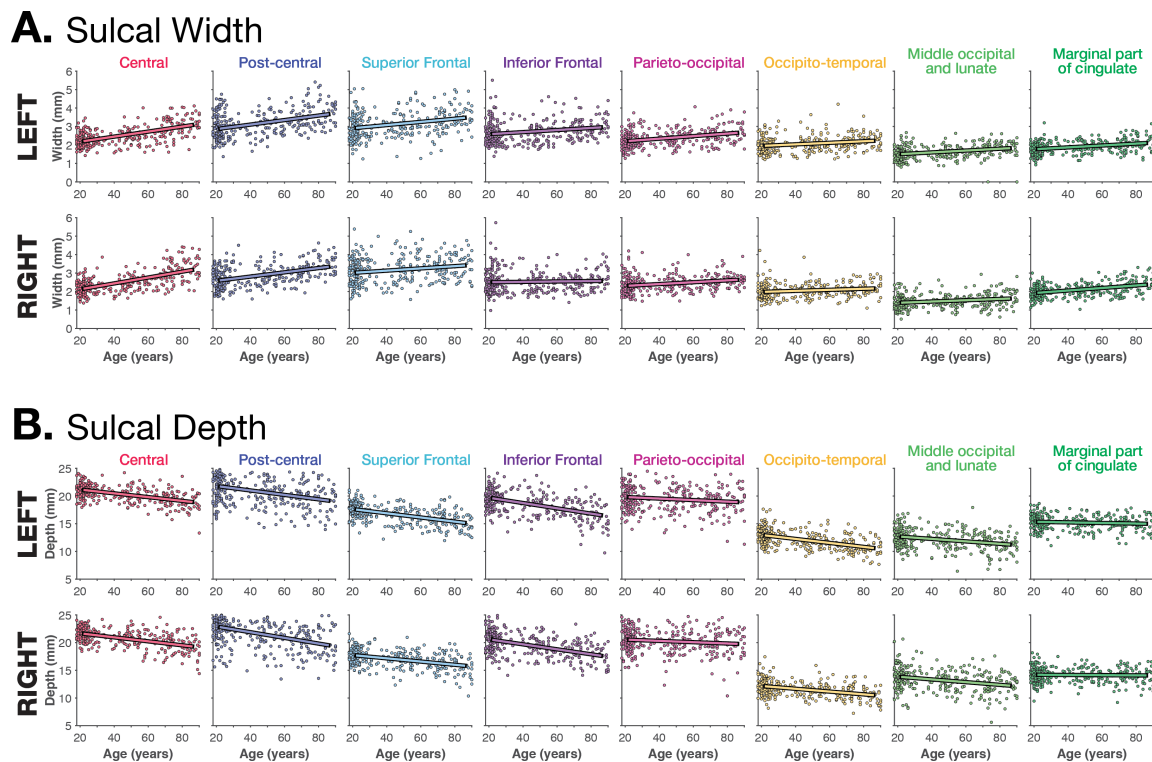

Figure 5. Relationship between (A) sulcal depth and (B) width for each of the sulci examined, based on the OASIS dataset.

246 To obtain a coarse summary measure across sulci, we averaged the sulcal width  
247 across the 16 individual sulci for each individual, and with each dataset, and examined  
248 the relationship between mean sulcal width with age. These correlations, shown in  
249 Table 1, indicate that the mean sulcal width was generally a better indicator of

| Sulci Name                  | FreeSurfer Label†     | Hemi. | OASIS          | DLBS           | SALD           | CCBD     |                 |
|-----------------------------|-----------------------|-------|----------------|----------------|----------------|----------|-----------------|
|                             |                       |       | <i>r</i> (Age) | <i>r</i> (Age) | <i>r</i> (Age) | ICC(1,1) | 95% CI of ICC   |
| Central                     | S_central             | L     | .586           | .486           | .322           | .858     | [ 0.785, 0.918] |
|                             |                       | R     | .632           | .523           | .294           | .842     | [ 0.764, 0.908] |
| Post-central                | S_postcentral         | L     | .413           | .391           | .198           | .764     | [ 0.660, 0.858] |
|                             |                       | R     | .460           | .436           | .213           | .864     | [ 0.794, 0.922] |
| Superior Frontal            | S_front_sup           | L     | .281           | .421           | .055           | .797     | [ 0.703, 0.880] |
|                             |                       | R     | .205           | .291           | .035           | .843     | [ 0.764, 0.909] |
| Inferior Frontal            | S_front_inf           | L     | .217           | .323           | -.037          | .775     | [ 0.675, 0.865] |
|                             |                       | R     | .043           | .222           | -.036          | .831     | [ 0.748, 0.901] |
| Parieto-occipital           | S_parieto_occipital   | L     | .348           | .279           | .145           | .616     | [ 0.486, 0.753] |
|                             |                       | R     | .257           | .357           | .213           | .682     | [ 0.561, 0.802] |
| Occipito-temporal           | S_oc-temp_med&Lingual | L     | .227           | .270           | -.055          | .660     | [ 0.535, 0.786] |
|                             |                       | R     | .168           | .189           | .017           | .692     | [ 0.572, 0.808] |
| Middle occipital and lunate | S_oc_middle&Lunatus   | L     | .306           | .271           | .145           | .605     | [ 0.474, 0.744] |
|                             |                       | R     | .212           | .177           | .023           | .625     | [ 0.496, 0.760] |
| Marginal part of cingulate  | S_cingul-Marginalis   | L     | .340           | .275           | .075           | .783     | [ 0.685, 0.871] |
|                             |                       | R     | .430           | .382           | .161           | .757     | [ 0.651, 0.853] |
| <i>Mean</i>                 |                       |       | .636           | .592           | .227           | .907     | [ 0.856, 0.947] |

Table 1

*Correlations between sulcal width and age for each sulci and hemisphere, for each of the three lifespan datasets examined. Test-retest reliability, ICC(1, 1), is also included from the CCBD dataset. †FreeSurfer labels in version 6.0; labels are named slightly different in version 5.3.*

*ICC values between .75 and 1.00 are considered ‘excellent,’ .60–.74 is ‘good,’ .40–.59 is ‘fair,’ and below .40 is ‘poor’ (Cicchetti, 1994).*

250 age-related differences in sulcal morphology than individual sulci, and had increased  
 251 test-retest reliability. Mean sulcal depth was similarly more sensitive to age-related  
 252 differences than for an individual sulcus (e.g., it is unclear why the relationship  
 253 between age and width of the central sulcus differed between samples) and the  
 254 magnitude of this relationship was more consistent across datasets. Reliability was  
 255 even higher for mean sulcal depth than mean sulcal width.

## 256 4.2 Comparison with other age-related structural differences

257 Within each dataset, mean sulcal depth and width correlated with age, as shown in  
 258 Tables 1 and 2. Of course, other measures of brain morphology also differ with age,  
 259 such as mean (global) cortical thickness [OASIS:  $r(308) = -.793, p < .001$ ; DLBS:  
 260  $r(310) = -.759, p < .001$ ; SALD:  $r(479) = -.642, p < .001$ ]. and volume of the third  
 261 ventricle (ICV-corrected) [OASIS:  $r(308) = .665, p < .001$ ; DLBS:  $r(310) = .677, p < .001$ ;



| Sulci Name                  | FreeSurfer Label†     | Hemi. | OASIS          | DLBS           | SALD           | CCBD     |                 |
|-----------------------------|-----------------------|-------|----------------|----------------|----------------|----------|-----------------|
|                             |                       |       | <i>r</i> (Age) | <i>r</i> (Age) | <i>r</i> (Age) | ICC(1,1) | 95% CI of ICC   |
| Central                     | S_central             | L     | -.517          | -.205          | -.346          | .848     | [ 0.772, 0.912] |
|                             |                       | R     | -.505          | -.256          | -.348          | .860     | [ 0.789, 0.919] |
| Post-central                | S_postcentral         | L     | -.371          | -.264          | -.268          | .965     | [ 0.944, 0.981] |
|                             |                       | R     | -.436          | -.246          | -.330          | .890     | [ 0.831, 0.937] |
| Superior Frontal            | S_front_sup           | L     | -.523          | -.454          | -.397          | .899     | [ 0.844, 0.943] |
|                             |                       | R     | -.413          | -.465          | -.444          | .886     | [ 0.825, 0.935] |
| Inferior Frontal            | S_front_inf           | L     | -.517          | -.490          | -.491          | .932     | [ 0.893, 0.962] |
|                             |                       | R     | -.496          | -.480          | -.490          | .915     | [ 0.868, 0.952] |
| Parieto-occipital           | S_parieto_occipital   | L     | -.145          | -.093          | -.241          | .979     | [ 0.966, 0.989] |
| Occipito-temporal           | S_oc-temp_med&Lingual | R     | -.124          | .059           | -.229          | .970     | [ 0.952, 0.984] |
|                             |                       | L     | -.509          | -.323          | -.263          | .953     | [ 0.926, 0.974] |
| Middle occipital and lunate | S_oc_middle&Lunatus   | R     | -.404          | -.316          | -.281          | .913     | [ 0.864, 0.951] |
|                             |                       | L     | -.290          | -.167          | -.150          | .949     | [ 0.919, 0.972] |
| Marginal part of cingulate  | S_cingul-Marginalis   | R     | -.288          | -.120          | -.132          | .922     | [ 0.879, 0.956] |
|                             |                       | L     | -.092          | -.035          | -.268          | .952     | [ 0.925, 0.974] |
|                             |                       | R     | -.032          | -.017          | -.156          | .918     | [ 0.872, 0.954] |
| <i>Mean</i>                 |                       |       | -.465          | -.645          | -.600          | .972     | [ 0.955, 0.985] |

Table 2

*Correlations between sulcal depth and age for each sulci and hemisphere, for each of the three lifespan datasets examined. Test-retest reliability, ICC(1, 1), is also included from the CCBD dataset. †FreeSurfer labels in version 6.0; labels are named slightly different in version 5.3. ICC values between .75 and 1.00 are considered ‘excellent,’ .60–.74 is ‘good,’ .40–.59 is ‘fair,’ and below .40 is ‘poor’ (Cicchetti, 1994).*

262 SALD:  $r(479) = .328, p < .001$ ]. Previous studies have demonstrated that both of these  
 263 measures are robust estimates of age-related differences in brain structure (Fjell et al.,  
 264 2009; Hogstrom et al., 2013; Hutton et al., 2009; Lemaitre et al., 2012; Madan &  
 265 Kensinger, 2016, 2017a; Madan, 2018; McKay et al., 2014; Salat et al., 2004; Sowell et al.,  
 266 2003, 2007; Walhovd et al., 2011).

267 To test if these mean sulcal measures served as distinct measures of age-related  
 268 differences in brain morphology, beyond those provided by other measures, such as  
 269 mean cortical thickness and volume of the third ventricle, we conducted partial  
 270 correlations that controlled for these two other measures of age-related atrophy. Mean  
 271 sulcal width [OASIS:  $r_p(306) = .188, p < .001$ ; DLBS:  $r_p(308) = .177, p = .002$ ; SALD:  
 272  $r(477) = .003, p = .96$ ] and depth [OASIS:  $r_p(306) = -.443, p < .001$ ; DLBS:  
 273  $r_p(308) = -.397, p < .001$ ; SALD:  $r_p(477) = -.534, p < .001$ ] both explained unique  
 274 variance in relation to age. Thus, even though more established measures of



275 age-related differences in brain morphology were replicated here, the additional sulcal  
276 measures captured aspects of aging that are not accounted for by these extant  
277 measures, indicating that these sulcal measures are worth pursuing further and are not  
278 redundant with other measures of brain structure. Providing additional support for  
279 this, mean sulcal width and depth were only weakly related to each other [OASIS:  
280  $r(308) = -.192, p < .001$ ; DLBS:  $r(310) = .092, p = .104$ ; SALD:  $r(479) = .119, p = .009$ ].

281 As with the individual sulci measures, we did observe a difference between  
282 samples where some age-related measures were less sensitive in the East Asian lifespan  
283 sample (SALD), here in the ventricle volume correlation and the unsurprisingly weaker  
284 age relationship in the partial correlation using sulcal width. These sample differences  
285 are puzzling, though there is a general correspondence between the two Western  
286 samples. Given that much of the literature is also based on Western samples, we think  
287 further research with East Asian samples, and particularly comparing samples with the  
288 same analysis pipeline, is necessary to shed further light on this initial finding.

## 289 5 Conclusion

290 Differences in sulcal width and depth are quite visually prominent, but are not often  
291 quantified when examining individual differences in cortical structure. Here we  
292 examined age-related differences in both sulcal measures as a proof-of-principle to  
293 demonstrate the utility of the calcSulc toolbox that accompanies this paper and is  
294 designed to closely compliment the standard FreeSurfer pipeline. This allows for the  
295 additional measurement of sulcal morphology, to add to the extant measures of brain  
296 morphology such as cortical thickness, area, and gyrification. Critically, this approach  
297 uses the same landmarks and boundaries as in the Destrieux et al. (2010) parcellation  
298 atlas, in contrast to all previous approaches to characterize sulcal features. This toolbox  
299 is now made freely available as supplemental to this paper:

300 <https://cmadan.github.io/calcSulc/>.

301 Using this approach, here we demonstrate age-related differences in sulcal width  
302 and depth, as well as high test-retest reliability. Since individual differences in sulcal

303 morphology are sufficiently distinct from those characterized by other brain  
304 morphology measures, this approach should complement extant work of investigating  
305 factors that influence brain morphology, e.g., see Figure 3 of Madan and Kensinger  
306 (2018). Given the flexibility in the methodological approach, these measures can be  
307 readily applied to other samples after being initially processed with FreeSurfer.

### 308 **Acknowledgments**

309 MRI data used in the preparation of this article were obtained from several sources,  
310 data were provided in part by: (1) the Open Access Series of Imaging Studies (OASIS)  
311 (Marcus et al., 2007); (2) wave 1 of the Dallas Lifespan Brain Study (DLBS) led by Dr.  
312 Denise Park and distributed through INDI (Mennes et al., 2013) and NITRC (Kennedy  
313 et al., 2016); (3) the Southwest University Adult Lifespan Dataset (SALD) (Wei et al.,  
314 2018), also made available through INDI and hosted on NITRC; and (4) the Center for  
315 Cognition and Brain Disorders (CCBD) (Chen et al., 2015) as dataset HNU1 in the  
316 Consortium for Reliability and Reproducibility (CoRR) (Zuo et al., 2014).

### 317 **Competing Interests**

318 The author declares that they have no competing interests.

References

319

- 320 Andersen, S. K., Jakobsen, C. E., Pedersen, C. H., Rasmussen, A. M., Plochanski, M., &  
321 Østergaard, L. R. (2015). Classification of Alzheimer's disease from MRI using  
322 sulcal morphology. In *Scandinavian Conference on Image Analysis (SCIA): Image*  
323 *Analysis* (pp. 103–113). Springer. doi: 10.1007/978-3-319-19665-7\_9
- 324 Andreasen, N. C., Harris, G., Cizadlo, T., Arndt, S., O'Leary, D. S., Swayze, V., & Flaum,  
325 M. (1994). Techniques for measuring sulcal/gyral patterns in the brain as  
326 visualized through magnetic resonance scanning: BRAINPLOT and BRAINMAP.  
327 *Proceedings of the National Academy of Sciences, 91*, 93–97. doi: 10.1073/pnas.91.1.93
- 328
- 329 Asendorpf, J., & Wallbott, H. G. (1979). Maße der Beobachterübereinstimmung: ein  
330 systematischer Vergleich. *Zeitschrift für Sozialpsychologie, 10*, 243–252.
- 331 Auzias, G., Brun, L., Deruelle, C., & Coulon, O. (2015). Deep sulcal landmarks:  
332 Algorithmic and conceptual improvements in the definition and extraction of  
333 sulcal pits. *NeuroImage, 111*, 12–25. doi: 10.1016/j.neuroimage.2015.02.008
- 334 Bartko, J. J. (1966). The intraclass correlation coefficient as a measure of reliability.  
335 *Psychological Reports, 19*, 3–11. doi: 10.2466/pr0.1966.19.1.3
- 336 Beeston, C. J., & Taylor, C. J. (2000). Automatic landmarking of cortical sulci. In *Medical*  
337 *image computing and computer-assisted intervention—MICCAI 2000* (pp. 125–133).  
338 Springer Berlin Heidelberg. doi: 10.1007/978-3-540-40899-4\_13
- 339 Behnke, K. J., Rettmann, M. E., Pham, D. L., Shen, D., Resnick, S. M., Davatzikos, C., &  
340 Prince, J. L. (2003). Automatic classification of sulcal regions of the human brain  
341 cortex using pattern recognition. In M. Sonka & J. M. Fitzpatrick (Eds.), *Medical*  
342 *imaging 2003: Image processing* (pp. 1499–1510). SPIE. doi: 10.1117/12.480834
- 343 Cai, K., Xu, H., Guan, H., Zhu, W., Jiang, J., Cui, Y., . . . Wen, W. (2017). Identification of  
344 early-stage Alzheimer's disease using sulcal morphology and other common  
345 neuroimaging indices. *PLOS ONE, 12*, e0170875. doi:  
346 10.1371/journal.pone.0170875
- 347 Campero, A., Ajler, P., Emmerich, J., Goldschmidt, E., Martins, C., & Rhoton, A. (2014).

- 348 Brain sulci and gyri: A practical anatomical review. *Journal of Clinical*  
349 *Neuroscience*, 21, 2219–2225. doi: 10.1016/j.jocn.2014.02.024
- 350 Cao, B., Mwangi, B., Passos, I. C., Wu, M.-J., Keser, Z., Zunta-Soares, G. B., ... Soares,  
351 J. C. (2017). Lifespan gyrification trajectories of human brain in healthy  
352 individuals and patients with major psychiatric disorders. *Scientific Reports*, 7,  
353 511. doi: 10.1038/s41598-017-00582-1
- 354 Chan, M. Y., Park, D. C., Savalia, N. K., Petersen, S. E., & Wig, G. S. (2014). Decreased  
355 segregation of brain systems across the healthy adult lifespan. *Proceedings of the*  
356 *National Academy of Sciences USA*, 111, E4997–E5006. doi:  
357 10.1073/pnas.1415122111
- 358 Chen, B., Xu, T., Zhou, C., Wang, L., Yang, N., Wang, Z., ... Weng, X.-C. (2015).  
359 Individual variability and test-retest reliability revealed by ten repeated  
360 resting-state brain scans over one month. *PLOS ONE*, 10, e0144963. doi:  
361 10.1371/journal.pone.0144963
- 362 Chen, G., Taylor, P. A., Haller, S. P., Kircanski, K., Stoddard, J., Pine, D. S., ... Cox, R. W.  
363 (2018). Intraclass correlation: Improved modeling approaches and applications  
364 for neuroimaging. *Human Brain Mapping*, 39, 1187–1206. doi: 10.1002/hbm.23909  
365
- 366 Cicchetti, D. V. (1994). Guidelines, criteria, and rules of thumb for evaluating normed  
367 and standardized assessment instruments in psychology. *Psychological Assessment*,  
368 6, 284–290. doi: 10.1037/1040-3590.6.4.284
- 369 Coffey, C. E., Wilkinson, W. E., Parashos, L., Soady, S., Sullivan, R. J., Patterson, L. J., ...  
370 Djang, W. T. (1992). Quantitative cerebral anatomy of the aging human brain: A  
371 cross-sectional study using magnetic resonance imaging. *Neurology*, 42, 527–527.  
372 doi: 10.1212/wnl.42.3.527
- 373 Destrieux, C., Fischl, B., Dale, A., & Halgren, E. (2010). Automatic parcellation of  
374 human cortical gyri and sulci using standard anatomical nomenclature.  
375 *NeuroImage*, 53, 1–15. doi: 10.1016/j.neuroimage.2010.06.010
- 376 Drayer, B. P. (1988). Imaging of the aging brain. Part I. normal findings. *Radiology*, 166,

- 377 785–796. doi: 10.1148/radiology.166.3.3277247
- 378 Elkis, H., Friedman, L., Wise, A., & Meltzer, H. Y. (1995). Meta-analyses of studies of  
379 ventricular enlargement and cortical sulcal prominence in mood disorders.  
380 *Archives of General Psychiatry*, 52, 735–746. doi:  
381 10.1001/archpsyc.1995.03950210029008
- 382 Eskildsen, S. F., Uldahl, M., & Ostergaard, L. R. (2005). Extraction of the cerebral  
383 cortical boundaries from MRI for measurement of cortical thickness. In  
384 J. M. Fitzpatrick & J. M. Reinhardt (Eds.), *Medical imaging 2005: Image processing*.  
385 SPIE. doi: 10.1117/12.595145
- 386 Fischl, B. (2012). FreeSurfer. *NeuroImage*, 62, 774–781. doi:  
387 10.1016/j.neuroimage.2012.01.021
- 388 Fischl, B., & Dale, A. M. (2000). Measuring the thickness of the human cerebral cortex  
389 from magnetic resonance images. *Proceedings of the National Academy of Sciences*  
390 *USA*, 97, 11050–11055. doi: 10.1073/pnas.200033797
- 391 Fjell, A. M., Westlye, L. T., Amlien, I., Espeseth, T., Reinvang, I., Raz, N., . . . Walhovd,  
392 K. B. (2009). High consistency of regional cortical thinning in aging across  
393 multiple samples. *Cerebral Cortex*, 19, 2001–2012. doi: 10.1093/cercor/bhn232
- 394 Hallgren, K. A. (2012). Computing inter-rater reliability for observational data: An  
395 overview and tutorial. *Tutorials in Quantitative Methods for Psychology*, 8, 23–34.  
396 doi: 10.20982/tqmp.08.1.p023
- 397 Hamelin, L., Bertoux, M., Bottlaender, M., Corne, H., Lagarde, J., Hahn, V., . . . Sarazin,  
398 M. (2015). Sulcal morphology as a new imaging marker for the diagnosis of early  
399 onset Alzheimer's disease. *Neurobiology of Aging*, 36, 2932–2939. doi:  
400 10.1016/j.neurobiolaging.2015.04.019
- 401 Hogstrom, L. J., Westlye, L. T., Walhovd, K. B., & Fjell, A. M. (2013). The structure of the  
402 cerebral cortex across adult life: Age-related patterns of surface area, thickness,  
403 and gyrification. *Cerebral Cortex*, 23, 2521–2530. doi: 10.1093/cercor/bhs231
- 404 Huckman, M. S., Fox, J., & Topel, J. (1975). The validity of criteria for the evaluation of  
405 cerebral atrophy by computed tomography. *Radiology*, 116, 85–92. doi:

406 10.1148/116.1.85

407 Hutton, C., Draganski, B., Ashburner, J., & Weiskopf, N. (2009). A comparison between  
408 voxel-based cortical thickness and voxel-based morphometry in normal aging.

409 *NeuroImage*, 48, 371–380. doi: 10.1016/j.neuroimage.2009.06.043

410 Im, K., Jo, H. J., Mangin, J.-F., Evans, A. C., Kim, S. I., & Lee, J.-M. (2010). Spatial  
411 distribution of deep sulcal landmarks and hemispherical asymmetry on the  
412 cortical surface. *Cerebral Cortex*, 20, 602–611. doi: 10.1093/cercor/bhp127

413 Jacoby, R. J., Levy, R., & Dawson, J. M. (1980). Computed tomography in the elderly: I.  
414 The normal population. *British Journal of Psychiatry*, 136, 249–255. doi:  
415 10.1192/bjp.136.3.249

416 John, J. P., Wang, L., Moffitt, A. J., Singh, H. K., Gado, M. H., & Csernansky, J. G. (2006).  
417 Inter-rater reliability of manual segmentation of the superior, inferior and middle  
418 frontal gyri. *Psychiatry Research: Neuroimaging*, 148, 151–163. doi:  
419 10.1016/j.psychresns.2006.05.006

420 Jones, S. E., Buchbinder, B. R., & Aharon, I. (2000). Three-dimensional mapping of  
421 cortical thickness using Laplace's equation. *Human Brain Mapping*, 11, 12–32. doi:  
422 10.1002/1097-0193(200009)11:1<12::aid-hbm20>3.0.co;2-k

423 Kennedy, D. N., Haselgrove, C., Riehl, J., Preuss, N., & Buccigrossi, R. (2016). The  
424 NITRC image repository. *NeuroImage*, 124, 1069–1073. doi:  
425 10.1016/j.neuroimage.2015.05.074

426 Kennedy, K. M., Rodrigue, K. M., Bischof, G. N., Hebrank, A. C., Reuter-Lorenz, P. A.,  
427 & Park, D. C. (2015). Age trajectories of functional activation under conditions of  
428 low and high processing demands: An adult lifespan fMRI study of the aging  
429 brain. *NeuroImage*, 104, 21–34. doi: 10.1016/j.neuroimage.2014.09.056

430 Kippenhan, J. S., Olsen, R. K., Mervis, C. B., Morris, C. A., Kohn, P., Meyer-Lindenberg,  
431 A., & Berman, K. F. (2005). Genetic contributions to human gyrification: Sulcal  
432 morphometry in Williams syndrome. *Journal of Neuroscience*, 25, 7840–7846. doi:  
433 10.1523/jneurosci.1722-05.2005

434 Kochunov, P., Fox, P., Lancaster, J., Tan, L. H., Amunts, K., Zilles, K., . . . Gao, J. H.

- 435 (2003). Localized morphological brain differences between english-speaking  
436 caucasians and chinese-speaking asians: new evidence of anatomical plasticity.  
437 *NeuroReport*, *14*, 961–964. doi: 10.1097/01.wnr.0000075417.59944.00
- 438 Kochunov, P., Mangin, J.-F., Coyle, T., Lancaster, J., Thompson, P., Rivière, D., ... Fox,  
439 P. T. (2005). Age-related morphology trends of cortical sulci. *Human Brain*  
440 *Mapping*, *26*, 210–220. doi: 10.1002/hbm.20198
- 441 Kochunov, P., Rogers, W., Mangin, J.-F., & Lancaster, J. (2012). A library of cortical  
442 morphology analysis tools to study development, aging and genetics of cerebral  
443 cortex. *Neuroinformatics*, *10*, 81–96. doi: 10.1007/s12021-011-9127-9
- 444 Kochunov, P., Thompson, P. M., Coyle, T. R., Lancaster, J. L., Kochunov, V., Royall, D.,  
445 ... Fox, P. T. (2008). Relationship among neuroimaging indices of cerebral health  
446 during normal aging. *Human Brain Mapping*, *29*, 36–45. doi: 10.1002/hbm.20369
- 447 Koo, T. K., & Li, M. Y. (2016). A guideline of selecting and reporting intraclass  
448 correlation coefficients for reliability research. *Journal of Chiropractic Medicine*, *15*,  
449 155–163. doi: 10.1016/j.jcm.2016.02.012
- 450 Laffey, P. A., Peyster, R. G., Nathan, R., Haskin, M. E., & McGinley, J. A. (1984).  
451 Computed tomography and aging: Results in a normal elderly population.  
452 *Neuroradiology*, *26*, 273–278. doi: 10.1007/BF00339770
- 453 Lamont, A. J., Mortby, M. E., Anstey, K. J., Sachdev, P. S., & Cherbuin, N. (2014). Using  
454 sulcal and gyral measures of brain structure to investigate benefits of an active  
455 lifestyle. *NeuroImage*, *91*, 353–359. doi: 10.1016/j.neuroimage.2014.01.008
- 456 Largent, J. W., Smith, R. C., Calderon, M., Baumgartner, R., Lu, R. B., Schoolar, J. C., &  
457 Ravichandran, G. K. (1984). Abnormalities of brain structure and density in  
458 schizophrenia. *Biological Psychiatry*, *19*, 991–1013.
- 459 Le Goualher, G., Barillot, C., Bizais, Y. J., & Scarabin, J.-M. (1996). Three-dimensional  
460 segmentation of cortical sulci using active models. In M. H. Loew &  
461 K. M. Hanson (Eds.), *Medical imaging 1996: Image processing* (pp. 254–263). SPIE.  
462 doi: 10.1117/12.237928
- 463 Le Goualher, G., Collins, D. L., Barillot, C., & Evans, A. C. (1998). Automatic



- 464        identificaition of cortical sulci using a 3d probabilistic atlas. In *Medical image*  
465        *computing and computer-assisted intervention – MICCAI’98* (pp. 509–518). Springer  
466        Berlin Heidelberg. doi: 10.1007/bfb0056236
- 467 Le Troter, A., Auzias, G., & Coulon, O. (2012). Automatic sulcal line extraction on  
468        cortical surfaces using geodesic path density maps. *NeuroImage*, *61*, 941–949. doi:  
469        10.1016/j.neuroimage.2012.04.021
- 470 Lee, J. K., Lee, J.-M., Kim, J. S., Kim, I. Y., Evans, A. C., & Kim, S. I. (2006). A novel  
471        quantitative cross-validation of different cortical surface reconstruction  
472        algorithms using MRI phantom. *NeuroImage*, *31*, 572–584. doi:  
473        10.1016/j.neuroimage.2005.12.044
- 474 Lemaitre, H., Goldman, A. L., Sambataro, F., Verchinski, B. A., Meyer-Lindenberg, A.,  
475        Weinberger, D. R., & Mattay, V. S. (2012). Normal age-related brain  
476        morphometric changes: nonuniformity across cortical thickness, surface area and  
477        gray matter volume? *Neurobiology of Aging*, *33*, 617.e1–617.e9. doi:  
478        10.1016/j.neurobiolaging.2010.07.013
- 479 Leong, R. L., Lo, J. C., Sim, S. K., Zheng, H., Tandi, J., Zhou, J., & Chee, M. W. (2017).  
480        Longitudinal brain structure and cognitive changes over 8 years in an east asian  
481        cohort. *NeuroImage*, *147*, 852–860. doi: 10.1016/j.neuroimage.2016.10.016
- 482 Li, G., Guo, L., Nie, J., & Liu, T. (2010). An automated pipeline for cortical sulcal fundi  
483        extraction. *Medical Image Analysis*, *14*, 343–359. doi: 10.1016/j.media.2010.01.005
- 484 Li, G., & Shen, D. (2011). Consistent sulcal parcellation of longitudinal cortical surfaces.  
485        *NeuroImage*, *57*, 76–88. doi: 10.1016/j.neuroimage.2011.03.064
- 486 Liu, T., Lipnicki, D. M., Zhu, W., Tao, D., Zhang, C., Cui, Y., ... Wen, W. (2012). Cortical  
487        gyrification and sulcal spans in early stage Alzheimer’s disease. *PLOS ONE*, *7*,  
488        e31083. doi: 10.1371/journal.pone.0031083
- 489 Liu, T., Sachdev, P. S., Lipnicki, D. M., Jiang, J., Geng, G., Zhu, W., ... Wen, W. (2013).  
490        Limited relationships between two-year changes in sulcal morphology and other  
491        common neuroimaging indices in the elderly. *NeuroImage*, *83*, 12–17. doi:  
492        10.1016/j.neuroimage.2013.06.058

- 493 Liu, T., Wen, W., Zhu, W., Kochan, N. A., Trollor, J. N., Reppermund, S., ... Sachdev,  
494 P. S. (2011). The relationship between cortical sulcal variability and cognitive  
495 performance in the elderly. *NeuroImage*, *56*, 865–873. doi:  
496 10.1016/j.neuroimage.2011.03.015
- 497 Liu, T., Wen, W., Zhu, W., Trollor, J., Reppermund, S., Crawford, J., ... Sachdev, P.  
498 (2010). The effects of age and sex on cortical sulci in the elderly. *NeuroImage*, *51*,  
499 19–27. doi: 10.1016/j.neuroimage.2010.02.016
- 500 Lohmann, G., & von Cramon, D. Y. (2000). Automatic labelling of the human cortical  
501 surface using sulcal basins. *Medical Image Analysis*, *4*, 179–188. doi:  
502 10.1016/s1361-8415(00)00024-4
- 503 Lohmann, G., von Cramon, D. Y., & Colchester, A. C. F. (2008). Deep sulcal landmarks  
504 provide an organizing framework for human cortical folding. *Cerebral Cortex*, *18*,  
505 1415–1420. doi: 10.1093/cercor/bhm174
- 506 Longstreth, W. T., Arnold, A. M., Manolio, T. A., Burke, G. L., Bryan, N., Jungreis,  
507 C. A., ... Fried, L. (2000). Clinical correlates of ventricular and sulcal size on  
508 cranial magnetic resonance imaging of 3,301 elderly people. *Neuroepidemiology*,  
509 *19*, 30–42. doi: 10.1159/000026235
- 510 Madan, C. R. (2017). Advances in studying brain morphology: The benefits of  
511 open-access data. *Frontiers in Human Neuroscience*, *11*, 405. doi:  
512 10.3389/fnhum.2017.00405
- 513 Madan, C. R. (2018). Age differences in head motion and estimates of cortical  
514 morphology. *PeerJ*, *6*, e5176. doi: 10.7717/peerj.5176
- 515 Madan, C. R. (2019). Shape-related characteristics of age-related differences in  
516 subcortical structures. *Aging & Mental Health*, *23*, 800–810. doi:  
517 10.1080/13607863.2017.1421613
- 518 Madan, C. R., & Kensinger, E. A. (2016). Cortical complexity as a measure of  
519 age-related brain atrophy. *NeuroImage*, *134*, 617–629. doi:  
520 10.1016/j.neuroimage.2016.04.029
- 521 Madan, C. R., & Kensinger, E. A. (2017a). Age-related differences in the structural

- 522 complexity of subcortical and ventricular structures. *Neurobiology of Aging*, 50,  
523 87–95. doi: 10.1016/j.neurobiolaging.2016.10.023
- 524 Madan, C. R., & Kensinger, E. A. (2017b). Test–retest reliability of brain morphology  
525 estimates. *Brain Informatics*, 4, 107–121. doi: 10.1007/s40708-016-0060-4
- 526 Madan, C. R., & Kensinger, E. A. (2018). Predicting age from cortical structure across  
527 the lifespan. *European Journal of Neuroscience*, 47, 399–416. doi: 10.1111/ejn.13835
- 528 Mangin, J.-F., Riviere, D., Cachia, A., Duchesnay, E., Cointepas, Y.,  
529 Papadopoulos-Orfanos, D., ... Regis, J. (2004). Object-based morphometry of the  
530 cerebral cortex. *IEEE Transactions on Medical Imaging*, 23, 968–982. doi:  
531 10.1109/tmi.2004.831204
- 532 Mangin, J.-F., Rivière, D., Coulon, O., Poupon, C., Cachia, A., Cointepas, Y., ...  
533 Papadopoulos-Orfanos, D. (2004). Coordinate-based versus structural  
534 approaches to brain image analysis. *Artificial Intelligence in Medicine*, 30, 177–197.  
535 doi: 10.1016/s0933-3657(03)00064-2
- 536 Marcus, D. S., Wang, T. H., Parker, J., Csernansky, J. G., Morris, J. C., & Buckner, R. L.  
537 (2007). Open Access Series of Imaging Studies (OASIS): Cross-sectional MRI data  
538 in young, middle aged, nondemented, and demented older adults. *Journal of*  
539 *Cognitive Neuroscience*, 19, 1498–1507. doi: 10.1162/jocn.2007.19.9.1498
- 540 McGraw, K. O., & Wong, S. P. (1996). Forming inferences about some intraclass  
541 correlation coefficients. *Psychological Methods*, 1, 30–46. doi:  
542 10.1037/1082-989x.1.1.30
- 543 McKay, D. R., Knowles, E. E. M., Winkler, A. A. M., Sprooten, E., Kochunov, P., Olvera,  
544 R. L., ... Glahn, D. C. (2014). Influence of age, sex and genetic factors on the  
545 human brain. *Brain Imaging and Behavior*, 8, 143–152. doi:  
546 10.1007/s11682-013-9277-5
- 547 Mennes, M., Biswal, B. B., Castellanos, F. X., & Milham, M. P. (2013). Making data  
548 sharing work: The FCP/INDI experience. *NeuroImage*, 82, 683–691. doi:  
549 10.1016/j.neuroimage.2012.10.064
- 550 Mikhael, S., Hoogendoorn, C., Valdes-Hernandez, M., & Pernet, C. (2018). A critical

- 551 analysis of neuroanatomical software protocols reveals clinically relevant  
552 differences in parcellation schemes. *NeuroImage*, 170, 348–364. doi:  
553 10.1016/j.neuroimage.2017.02.082
- 554 Ming, J., Harms, M. P., Morris, J. C., Beg, M. F., & Wang, L. (2015). Integrated cortical  
555 structural marker for Alzheimer’s disease. *Neurobiology of Aging*, 36, S53–S59. doi:  
556 10.1016/j.neurobiolaging.2014.03.042
- 557 Nowinski, W. L., Raphel, J. K., & Nguyen, B. T. (1996). Atlas-based identification of  
558 cortical sulci. In Y. Kim (Ed.), *Medical imaging 1996: Image display* (pp. 64–74).  
559 SPIE. doi: 10.1117/12.238488
- 560 Oguz, I., Cates, J., Fletcher, T., Whitaker, R., Cool, D., Aylward, S., & Styner, M. (2008).  
561 Cortical correspondence using entropy-based particle systems and local features.  
562 In *2008 5th IEEE International Symposium on Biomedical Imaging: From nano to macro*  
563 (pp. 1637–1640). IEEE. doi: 10.1109/isbi.2008.4541327
- 564 Ono, M., Kubick, S., & Abernathy, C. D. (1990). *Atlas of the cerebral sulci*. Thieme.
- 565 Palaniyappan, L., Park, B., Balain, V., Dangi, R., & Liddle, P. (2015). Abnormalities in  
566 structural covariance of cortical gyrification in schizophrenia. *Brain Structure and*  
567 *Function*, 220, 2059–2071. doi: 10.1007/s00429-014-0772-2
- 568 Pasquier, F., Leys, D., Weerts, J. G., Mounier-Vehier, F., Barkhof, F., & Scheltens, P.  
569 (1996). Inter- and intraobserver reproducibility of cerebral atrophy assessment on  
570 MRI scans with hemispheric infarcts. *European Neurology*, 36, 268–272. doi:  
571 10.1159/000117270
- 572 Perrot, M., Rivière, D., & Mangin, J.-F. (2011). Cortical sulci recognition and spatial  
573 normalization. *Medical Image Analysis*, 15, 529–550. doi:  
574 10.1016/j.media.2011.02.008
- 575 Pizzagalli, F., Auzias, G., Kochunov, P., Faskowitz, J. I., Thompson, P. M., & Jahanshad,  
576 N. (2017). The core genetic network underlying sulcal morphometry. In  
577 E. Romero, N. Lepore, J. Brieve, & I. Larrabide (Eds.), *International Symposium on*  
578 *Medical Information Processing and Analysis*. SPIE. doi: 10.1117/12.2256959
- 579 Plocharski, M., & Østergaard, L. R. (2016). Extraction of sulcal medial surface and

- 580 classification of Alzheimer's disease using sulcal features. *Computer Methods and*  
581 *Programs in Biomedicine*, 133, 35–44. doi: 10.1016/j.cmpb.2016.05.009
- 582 Rajaratnam, N. (1960). Reliability formulas for independent decision data when  
583 reliability data are matched. *Psychometrika*, 25, 261–271. doi: 10.1007/bf02289730
- 584 Reiner, P., Jouvent, E., Duchesnay, E., Cuingnet, R., Mangin, J.-F., & Chabriat, H. (2012).  
585 Sulcal span in Alzheimer's disease, amnesic mild cognitive impairment, and  
586 healthy controls. *Journal of Alzheimer's Disease*, 29, 605–613. doi:  
587 10.3233/JAD-2012-111622
- 588 Rhoton, A. L. (2007). The cerebrum. *Neurosurgery*, 61, SHC-37–SHC-119. doi:  
589 10.1227/01.neu.0000255490.88321.ce
- 590 Rieder, R. O., Donnelly, E. F., Herdt, J. R., & Waldman, I. N. (1979). Sulcal prominence  
591 in young chronic schizophrenic patients: CT scan findings associated with  
592 impairment on neuropsychological tests. *Psychiatry Research*, 1, 1–8. doi:  
593 10.1016/0165-1781(79)90021-0
- 594 Rivière, D., Mangin, J.-F., Papadopoulos-Orfanos, D., Martinez, J.-M., Frouin, V., &  
595 Régis, J. (2002). Automatic recognition of cortical sulci of the human brain using  
596 a congregation of neural networks. *Medical Image Analysis*, 6, 77–92. doi:  
597 10.1016/s1361-8415(02)00052-x
- 598 Royackkers, N., Desvignes, M., Fawal, H., & Revenu, M. (1999). Detection and  
599 statistical analysis of human cortical sulci. *NeuroImage*, 10, 625–641. doi:  
600 10.1006/nimg.1999.0512
- 601 Salat, D. H., Buckner, R. L., Snyder, A. Z., Greve, D. N., Desikan, R. S. R., Busa, E., ...  
602 Fischl, B. (2004). Thinning of the cerebral cortex in aging. *Cerebral Cortex*, 14,  
603 721–730. doi: 10.1093/cercor/bhh032
- 604 Schaer, M., Cuadra, M. B., Schmansky, N., Fischl, B., Thiran, J.-P., & Eliez, S. (2012).  
605 How to measure cortical folding from MR images: A step-by-step tutorial to  
606 compute local gyrification index. *Journal of Visualized Experiments*, e3417. doi:  
607 10.3791/3417
- 608 Scheltens, P., Pasquier, F., Weerts, J. G., Barkhof, F., & Leys, D. (1997). Qualitative

- 609 assessment of cerebral atrophy on MRI: Inter- and intra-observer reproducibility  
610 in dementia and normal aging. *European Neurology*, 37, 95–99. doi:  
611 10.1159/000117417
- 612 Shrout, P. E., & Fleiss, J. L. (1979). Intraclass correlations: Uses in assessing rater  
613 reliability. *Psychological Bulletin*, 86, 420–428. doi: 10.1037/0033-2909.86.2.420
- 614 Sowell, E. R., Peterson, B. S., Kan, E., Woods, R. P., Yoshii, J., Bansal, R., ... Toga, A. W.  
615 (2007). Sex differences in cortical thickness mapped in 176 healthy individuals  
616 between 7 and 87 years of age. *Cerebral Cortex*, 17, 1550–1560. doi:  
617 10.1093/cercor/bhl066
- 618 Sowell, E. R., Peterson, B. S., Thompson, P. M., Welcome, S. E., Henkenius, A. L., &  
619 Toga, A. W. (2003). Mapping cortical change across the human life span. *Nature*  
620 *Neuroscience*, 6, 309–315. doi: 10.1038/nn1008
- 621 Tang, Y., Hojatkashani, C., Dinov, I. D., Sun, B., Fan, L., Lin, X., ... Toga, A. W. (2010).  
622 The construction of a chinese MRI brain atlas: A morphometric comparison study  
623 between chinese and caucasian cohorts. *NeuroImage*, 51, 33–41. doi:  
624 10.1016/j.neuroimage.2010.01.111
- 625 ten Donkelaar, H. J., Tzourio-Mazoyer, N., & Mai, J. K. (2018). Toward a common  
626 terminology for the gyri and sulci of the human cerebral cortex. *Frontiers in*  
627 *Neuroanatomy*, 12, 93. doi: 10.3389/fnana.2018.00093
- 628 Thompson, P. M., Schwartz, C., Lin, R. T., Khan, A. A., & Toga, A. W. (1996).  
629 Three-dimensional statistical analysis of sulcal variability in the human brain.  
630 *Journal of Neuroscience*, 16, 4261–4274. doi: 10.1523/jneurosci.16-13-04261.1996
- 631 Tomlinson, B., Blessed, G., & Roth, M. (1968). Observations on the brains of  
632 non-demented old people. *Journal of the Neurological Sciences*, 7, 331–356. doi:  
633 10.1016/0022-510x(68)90154-8
- 634 Vaillant, M., & Davatzikos, C. (1997). Finding parametric representations of the cortical  
635 sulci using an active contour model. *Medical Image Analysis*, 1, 295–315. doi:  
636 10.1016/s1361-8415(97)85003-7
- 637 Walhovd, K. B., Westlye, L. T., Amlien, I., Espeseth, T., Reinvang, I., Raz, N., ... Fjell,



- 638 A. M. (2011). Consistent neuroanatomical age-related volume differences across  
639 multiple samples. *Neurobiology of Aging*, 32, 916–932. doi:  
640 10.1016/j.neurobiolaging.2009.05.013
- 641 Wei, D., Zhuang, K., Ai, L., Chen, Q., Yang, W., Liu, W., ... Qiu, J. (2018). Structural  
642 and functional brain scans from the cross-sectional southwest university adult  
643 lifespan dataset. *Scientific Data*, 5, 180134. doi: 10.1038/sdata.2018.134
- 644 Welker, W. (1990). Why does cerebral cortex fissure and fold? In E. G. Jones &  
645 A. Peters (Eds.), *Cerebral cortex* (Vol. 8B, pp. 3–136). Springer US. doi:  
646 10.1007/978-1-4615-3824-0\_1
- 647 Yang, F., & Kruggel, F. (2008). Automatic segmentation of human brain sulci. *Medical  
648 Image Analysis*, 12, 442–451. doi: 10.1016/j.media.2008.01.003
- 649 Yue, N. C., Arnold, A. M., Longstreth, W. T., Elster, A. D., Jungreis, C. A., O'Leary,  
650 D. H., ... Bryan, R. N. (1997). Sulcal, ventricular, and white matter changes at  
651 MR imaging in the aging brain: Data from the cardiovascular health study.  
652 *Radiology*, 202, 33–39. doi: 10.1148/radiology.202.1.8988189
- 653 Yun, H. J., Im, K., Yang, J.-J., Yoon, U., & Lee, J.-M. (2013). Automated sulcal depth  
654 measurement on cortical surface reflecting geometrical properties of sulci. *PLOS  
655 ONE*, 8, e55977. doi: 10.1371/journal.pone.0055977
- 656 Zuo, X.-N., Anderson, J. S., Bellec, P., Birn, R. M., Biswal, B. B., Blautzik, J., ... Milham,  
657 M. P. (2014). An open science resource for establishing reliability and  
658 reproducibility in functional connectomics. *Scientific Data*, 1, 140049. doi:  
659 10.1038/sdata.2014.49
